# Supplementary material for: The oxidative esterification of glycerol to methyl glycerate in methanol using gold on oxidic supports: an insight in product selectivity
Source: Royal Society of Chemistry journal article supplement (doi:10.1039/c2gc35226e), 2012-01-01
Supplement: c2gc35226e.pdf [file c2gc35226e.pdf]

## Supporting Information

### **The oxidative esterification of glycerol to methyl glycerate in methanol using gold on oxidic supports: An insight in product selectivity**

**Rajeesh Kumar Pazhavelikkakath Purushothaman, J. van Haveren, D.S. van Es, I. Melian Cabrera and H.J. Heeres**

#### **FT-IR measurements on fresh and spent catalysts**

Fourier transform infrared (FT-IR) spectra were obtained on a Varian Scimitar 1000 FT-IR spectrometer equipped with a Pike MIRacle ATR Diamond/ZnSe single reflection plate and a DTGS-detector. The measurement resolution was set at 4 cm<sup>-1</sup>, and the spectra were collected in the range 4000–650 cm<sup>-1</sup> with 64 co-added scans

The spent catalysts were separated by filtration and washed several times with methanol under vacuum. Prior to analyses, the catalysts were dried in a vacuum oven at 50° C for 20 h in the presence of desiccant.

All spectra are provided in Figure S1.

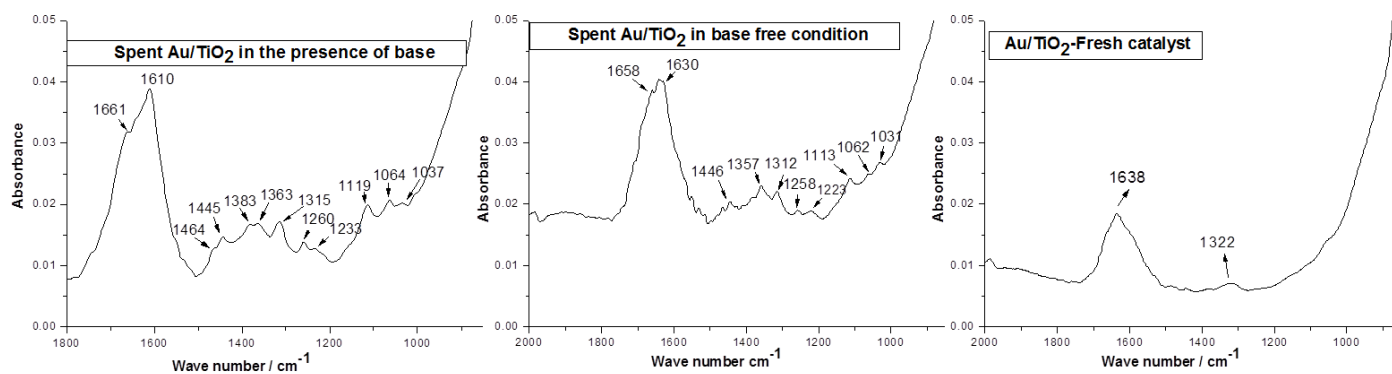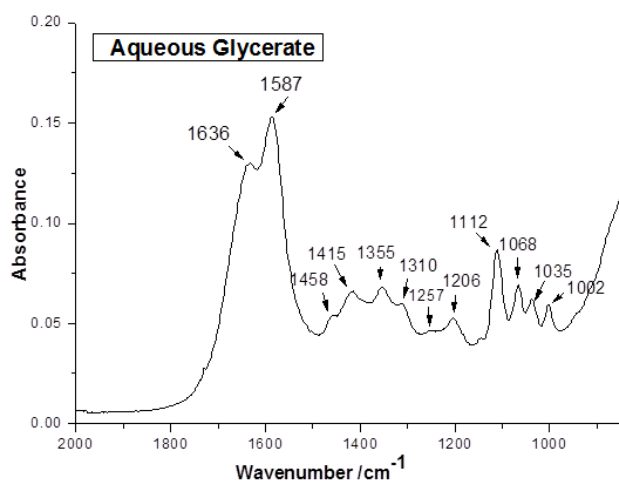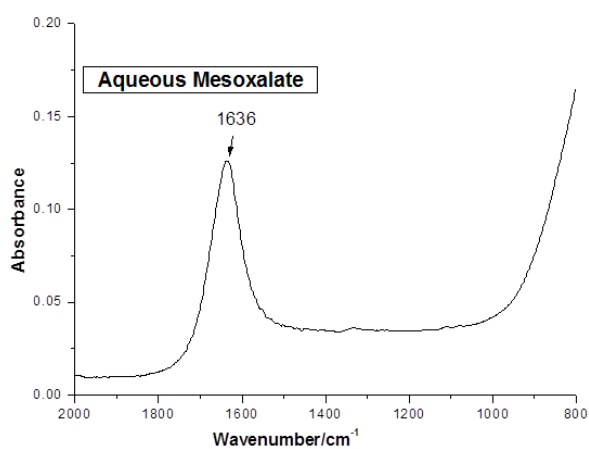

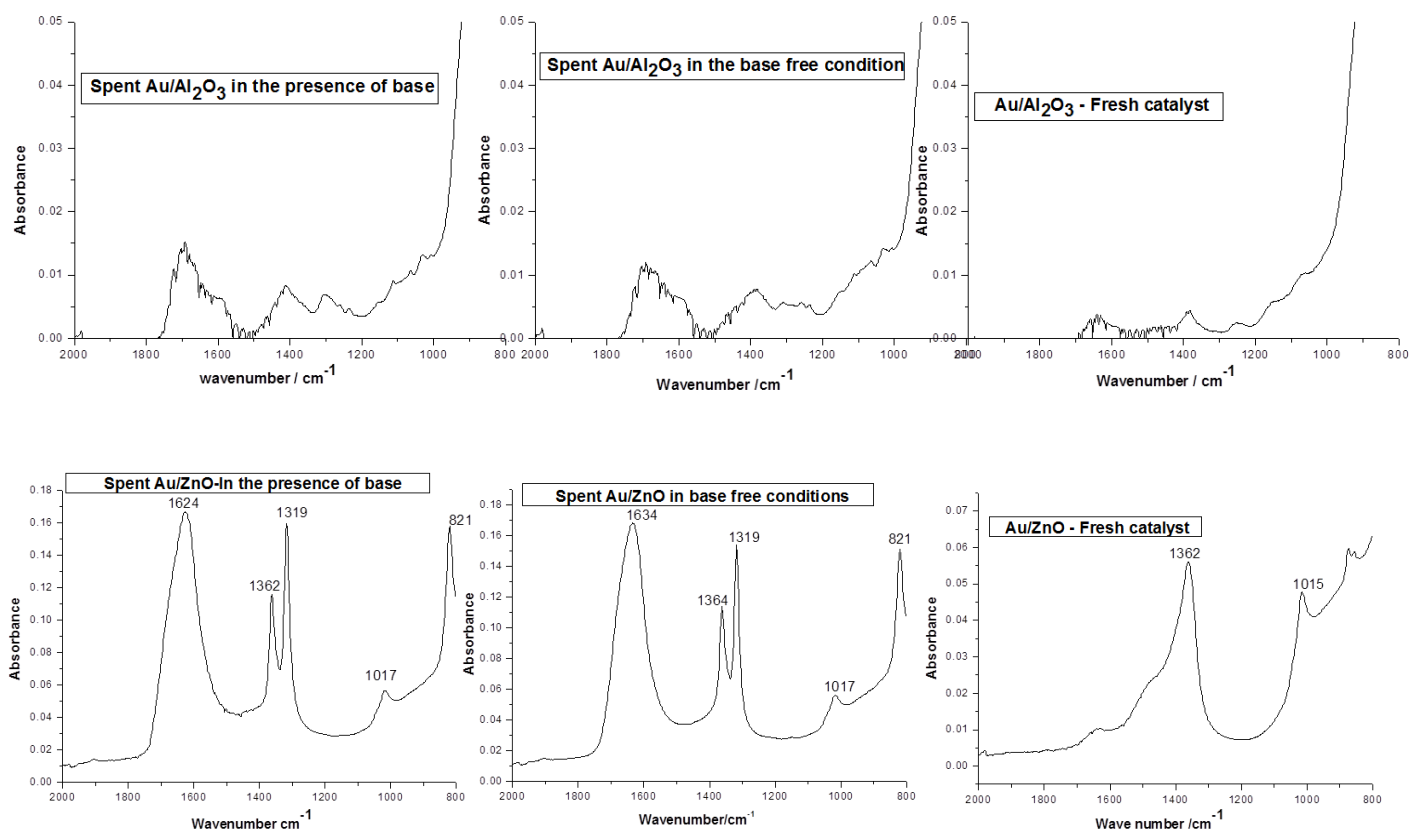

**Figure S1.** FT-IR spectra

### TEM measurements

Transmission Electron Microscopy (TEM) images of the fresh and spent Au/TiO<sub>2</sub> catalyst are given in Figure S2 (Fresh catalyst) and Figure S3 (Spent catalyst, used in the presence of base).

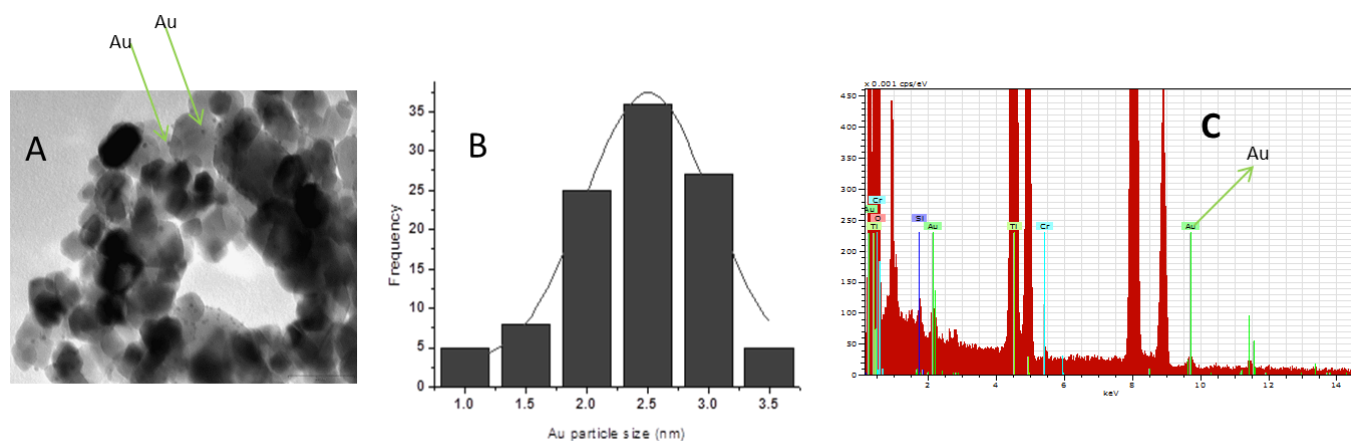

**Figure S2.** (A) TEM image of Au/TiO<sub>2</sub> (Fresh). Scale is 50nm (B) Particle size distribution (C) Representative EDAX spectra taken for a single Au particle

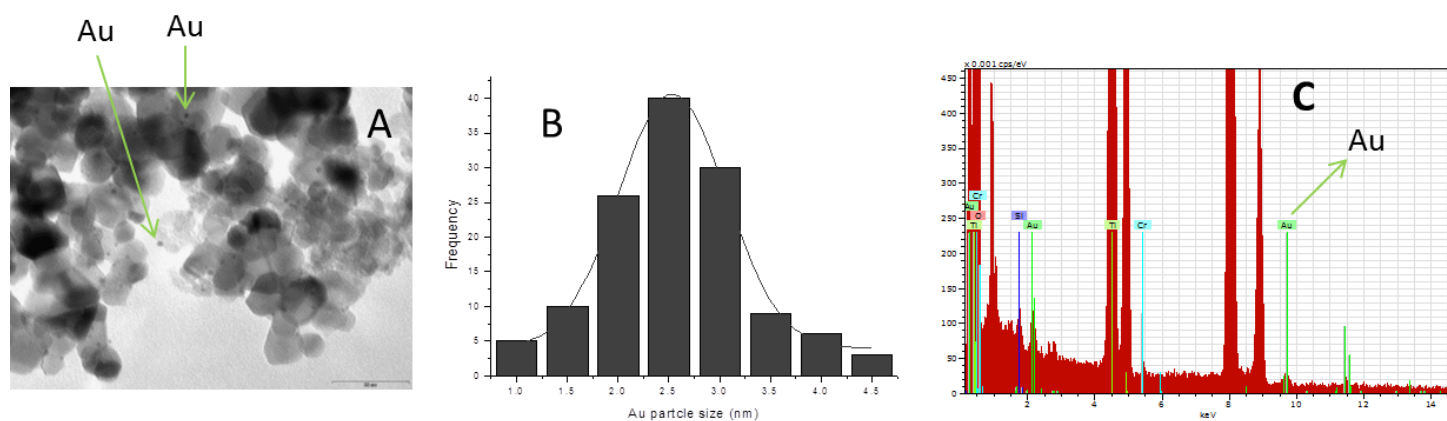

**Figure S3.** TEM image of Au/TiO<sub>2</sub> (Spent) . Scale is 50nm (B) Particle size distribution (c) Representative EDAX spectra taken for a single Au particle

### Recycle studies using the Au/TiO<sub>2</sub> catalyst

After an oxidation experiment (30 h), the Au/TiO<sub>2</sub> catalyst was recovered by filtration under vacuum and washed several times with methanol. Then the catalyst was suspended in methanol-water (200 mL, 1:1 ratio) and heated to 80° C at stirring for 5 h. The catalyst was recovered by a vacuum filtration, washed with methanol several times and dried under vacuum at 323 K in the presence of a desiccant (Phosphorous pentoxide, Sigma-Aldrich) for 20 h. This recycled catalyst was tested for the oxidative esterification of glycerol in the presence of base (Table S1).

**Table S1.** Oxidative esterification of glycerol over Au/TiO<sub>2</sub> catalysts in the presence of 10 mol% base on glycerol

| Time (h) | Glycerol conversion (%) | Selectivity (%) |      |     |     |      |       | Carbon mass balance closure (%) |
|----------|-------------------------|-----------------|------|-----|-----|------|-------|---------------------------------|
|          |                         | GLA/DHA         | MGLY | DMT | DMM | MPYR | MGLYC |                                 |
| 5        | 45                      | 9               | 71   | 2   | 6   | 2    | 2     | 93                              |
| 30       | 69                      | 2               | 81   | 0.5 | 10  | 1    | 0.5   | 95                              |

Reaction conditions: Glycerol: methanol = 1:99, Glycerol/metal = 153, T = 353 K, P (O<sub>2</sub>) = 5 bar

Both fresh and spent catalyst were characterised by TEM, physisorption using nitrogen and ICP-OES. TEM showed no significant sintering of Au particles whereas changes in the Au content (ICP-OES) and the BET surface area are limited (Table S2).

**Table S2.** Characterisation of the Au/TiO<sub>2</sub> catalysts (fresh and spent)

| Catalyst            | Condition        | Au (wt%) | BET, m <sup>2</sup> /g | Pore volume (PV), cm <sup>3</sup> /g | Micropore volume, cm <sup>3</sup> /g | Average pore size (4·PV/BET), nm |
|---------------------|------------------|----------|------------------------|--------------------------------------|--------------------------------------|----------------------------------|
| Au/TiO <sub>2</sub> | Fresh            | 1.2      | 50                     | 0.352                                | below detection                      | 28.1                             |
| Au/TiO <sub>2</sub> | Spent, base      | 1.1      | 52                     | 0.320                                | below detection                      | 24.7                             |
| Au/TiO <sub>2</sub> | Spent, base free | 1.2      | 47                     | 0.306                                | below detection                      | 25.8                             |
